# Supplementary material for: Co-incidence of Damage and Microbial Patterns Controls Localized Immune Responses in Roots
Source: PubMed Central journal article supplement (PMC7042715; doi:10.1016/j.cell.2020.01.013), 2020-02-06
Supplement: mmc1.pdf [file mmc1.pdf]

**Cell, Volume 180**

**Supplemental Information**

**Co-occurrence of Damage and Microbial Patterns**

**Controls Localized Immune Responses in Roots**

**Feng Zhou, Aurélie Emonet, Valérie Dénervaud Tendon, Peter Marhavy, Dousheng Wu, Thomas Lahaye, and Niko Geldner**

**Table S1. Primers Used for Cloning Promoters of Different Reporter Lines in This Study, Related to STAR Methods.**

| Promoter line               | AGI number | Forward primer        | Reverse primer         |
|-----------------------------|------------|-----------------------|------------------------|
| <i>pFRK1</i>                | At2g19190  | ATCCCTGACAGTGAAGCTT   | ATTGAGCTGCTTTCTCTG     |
| <i>pPER5</i>                | At1g14550  | CTCAGTGCCTAGTAGTGAG   | ATTGTAGATCTCACTTGGT    |
| <i>pWRKY11</i>              | At4g31550  | CTTCCCCACCCATATATAG   | GATGATTTCTTGGTCTGAGGAT |
| <i>pMYB51</i>               | At1g18570  | TGTACTAAAGAACTACTGTAA | TCTTGATTCTTCAAACCTAGCT |
| <i>pFLS2</i>                | At5g46330  | TATTTTAAATCGCCTATTT   | AAATCTATAGACGAAGTCA    |
| <i>pFLS2<sub>long</sub></i> | At5g46330  | CGTTTTATAGATGGATCGGGT | GGTTTAGACTTTAGAAGAGTTG |
| <i>pEFR</i>                 | At5g20480  | TCCCTCACGTTTCGATGGAG  | CATTACAGTCGTGGGGCAAT   |
| <i>pCERK1</i>               | At3g21630  | GCACTACAGGGCATGGACC   | GCTTCCTTAGATTCCCCAGAG  |
| <i>pRLP23</i>               | AT2G32680  | TGGTGGATTTGGTAAAGGCA  | GGTTGTCTTGAAATATCTTTTA |
| <i>pLORE</i>                | AT1G61380  | ATCTGTGATTCAAGGGCGTTA | GGGGATAGAGTGAGCATTGAG  |
